# Supplementary material
Source: Springer Nature journal article supplement (https://www.springermedizin.de/resource/supplementary/12916_2006_91_MOESM2_ESM.pdf/9599156)

## Green Tea

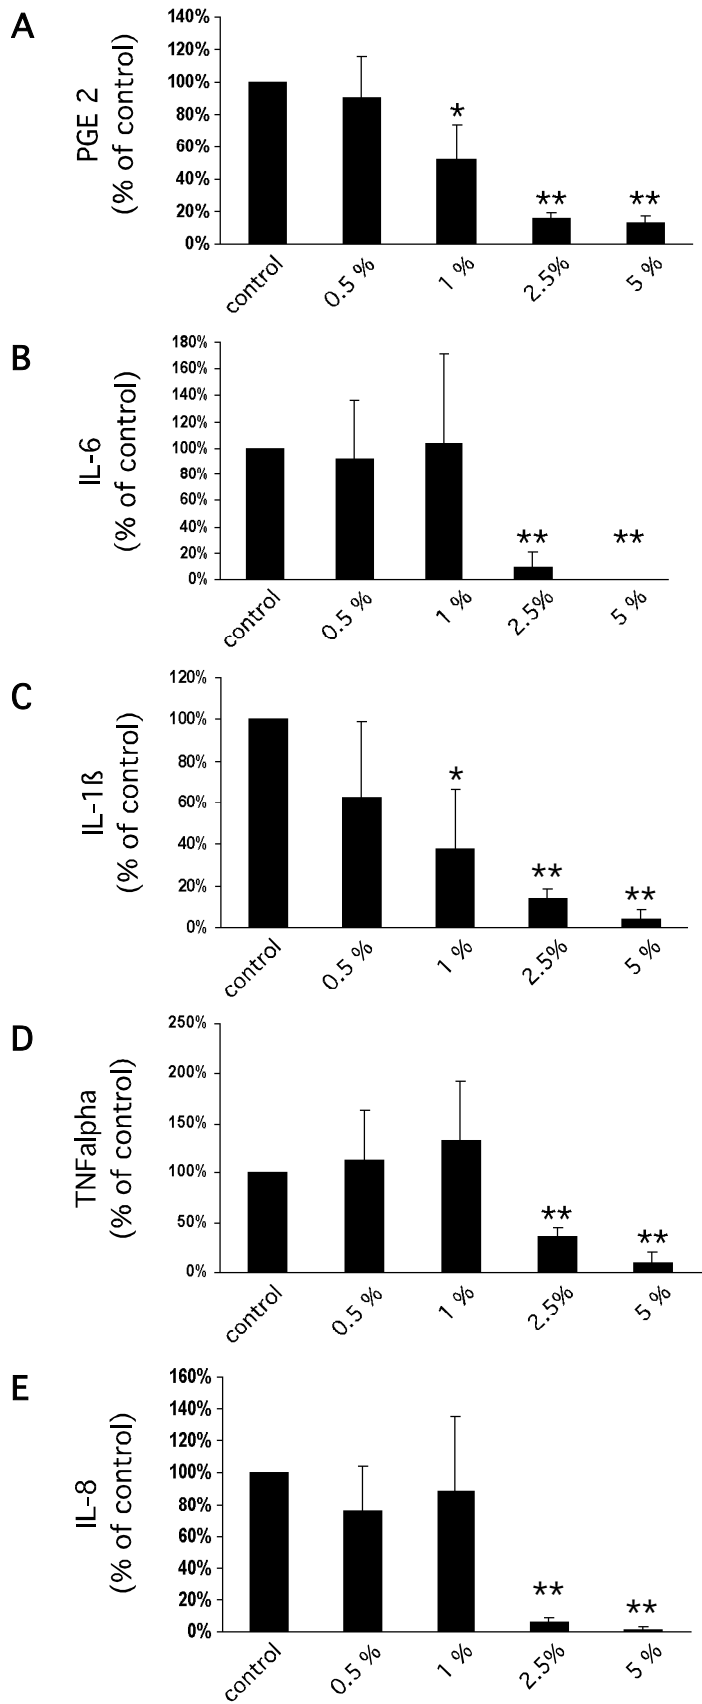

## Black Tea

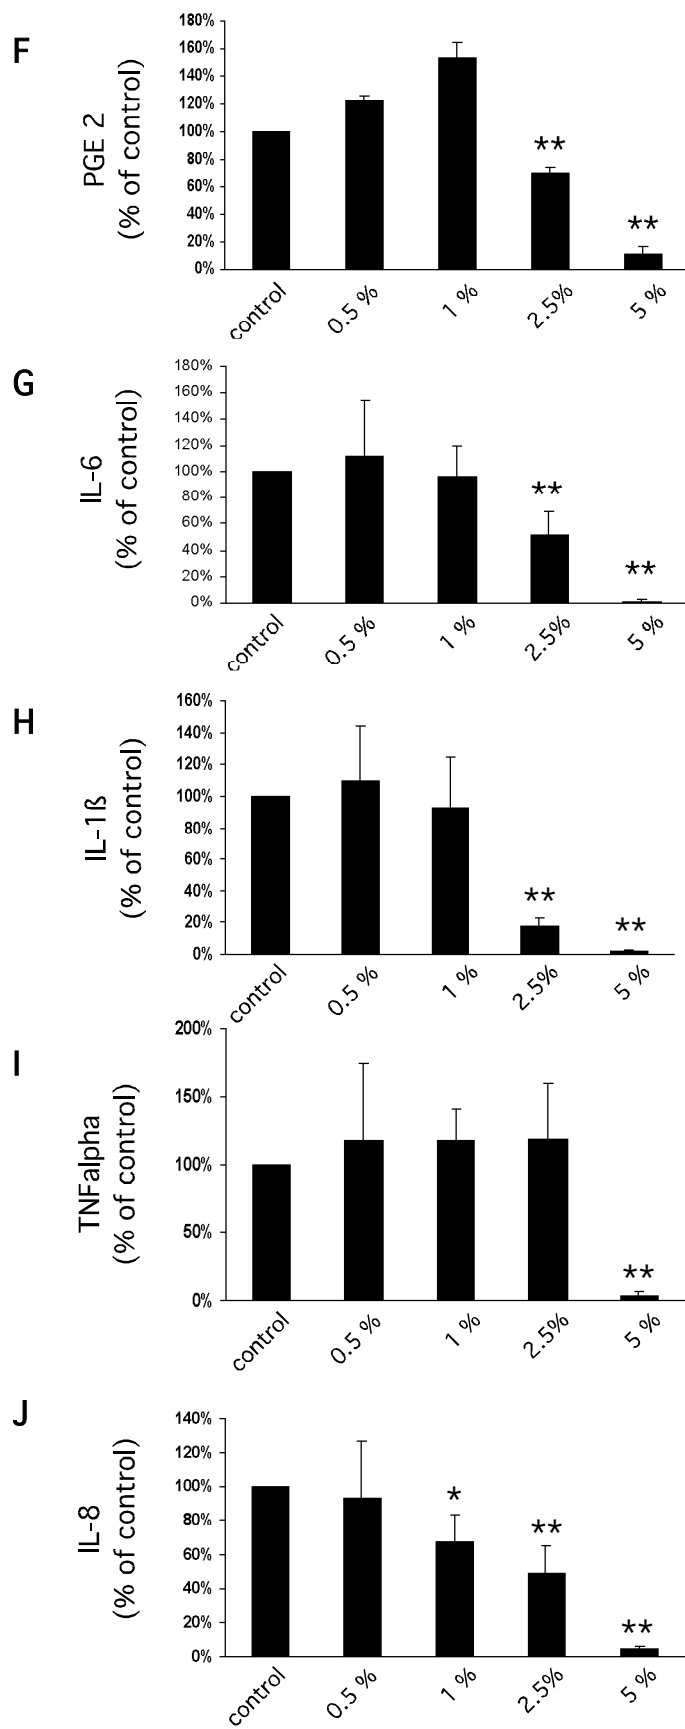

Supplement: MOESM2 [file 9599156]
